# Supplementary material for: Hepatocyte-targeted siTAZ therapy lowers liver fibrosis in NASH diet-fed chimeric mice with hepatocyte-humanized livers
Source: PubMed Central journal article supplement — Mol Ther Methods Clin Dev. 2023 Nov 23;31:101165. doi: 10.1016/j.omtm.2023.101165 (PMC10746533; doi:10.1016/j.omtm.2023.101165), 2023-11-23
Supplement: mmc1.pdf [file mmc1.pdf]

**OMTM, Volume 31**

**Supplemental information**

**Hepatocyte-targeted siTAZ therapy lowers liver  
fibrosis in NASH diet-fed chimeric mice  
with hepatocyte-humanized livers**

**Xiaobo Wang, Mary P. Moore, Hongxue Shi, Yoshinari Miyata, Sara K. Donnelly, Daniel R. Radloff, and Ira Tabas**

**Table S1 Primers used for QPCR.**

| Primers                | Sequences                  |
|------------------------|----------------------------|
| <i>Hprt</i> F          | TCAGTCAACGGGGGACATAAA      |
| <i>Hprt</i> R          | GGGGCTGTACTGCTTAACCAG      |
| <i>Acta2</i> F         | ATGCTCCCAGGGCTGTTTTCCCAT   |
| <i>Acta2</i> R         | GTGGTGCCAGATCTTTTCCATGTCTG |
| <i>Colla1</i> F        | GCTCCTCTTAGGGGCCACT        |
| <i>Colla1</i> R        | CCACGTCTCACCATTGGGG        |
| <i>Colla2</i> F        | GTAAC TTCGTGCCTAGCAACA     |
| <i>Colla2</i> R        | CCTTTGTCAGAATACTGAGCAGC    |
| <i>Col3a1</i> F        | CTGTAACATGGAAACTGGGGAAA    |
| <i>Col3a1</i> R        | CCATAGCTGAACTGAAAACCACC    |
| <i>Emr1 (Adgre1)</i> F | ACCACAATACCTACATGCACC      |
| <i>Emr1 (Adgre1)</i> R | AAGCAGGCGAGGAAAAGATAG      |
| <i>Tnfa</i> F          | CTTCTGTCTACTGAACTTCGGG     |
| <i>Tnfa</i> R          | CAGGCTTGTCACTCGAATTTTG     |
| <i>Mcp1</i> F          | TTAAAAACCTGGATCGGAACCAA    |
| <i>Mcp1</i> R          | GCATTAGCTTCAGATTTACGGGT    |
| <i>Spp1</i> F          | CTGACCCATCTCAGAAGCAGAATCT  |
| <i>Spp1</i> R          | TCCATGTGGTCATGGCTTTCATTGG  |
| <i>Timp1</i> F         | CTCAAAGACCTATAGTGCTGGC     |
| <i>Timp1</i> R         | CAAAGTGACGGCTCTGGTAG       |
| <i>Tgfb1</i> F         | CTCCCGTGGCTTCTAGTGC        |
| <i>Tgfb1</i> R         | GCCTTAGTTTGGACAGGATCTG     |
| <i>Cxcl9</i> F         | TCCTTTTGGGCATCATCTTCC      |
| <i>Cxcl9</i> R         | TTTGTAGTGGATCGTGCCTCG      |
| <i>HPRT</i> F          | CCTGGCGTCGTGATTAGTGAT      |
| <i>HPRT</i> R          | AGACG TTCAGTCCTGTCCATAA    |
| <i>WWTR1</i> F         | TCCCAGCCAAATCTCGTGATG      |
| <i>WWTR1</i> R         | AGCGCATTGGGCATACTCAT       |
| <i>IHH</i> F           | AACTCGCTGGCTATCTCGGT       |
| <i>IHH</i> R           | GCCCTCATAATGCAGGGACT       |
| <i>HES1</i> F          | TCAACACGACACCGGATAAAC      |
| <i>HES1</i> R          | GCCGCGAGCTATCTTTCTTCA      |
| <i>NOTCH1</i> F        | GAGGCGTGGCAGACTATGC        |
| <i>NOTCH1</i> R        | CTTGTACTCCGTCAGCGTGA       |
| <i>EPHB2</i> F         | CGGCTGCATGTCCCTCATC        |
| <i>EPHB2</i> R         | GTCCCCGTTACAGTAGAGCTT      |

*Hprt*, hypoxanthine guanine phosphoribosyl transferase; *WWTR1*, WW domain containing transcription regulator 1; *Acta2*,  $\alpha$ -smooth muscle actin; *Colla1*, collagen type I alpha 1; *Colla2*, collagen type I alpha 2; *Col3a1*, collagen, type III, alpha 1; *Emr1 (Adgre1)*, adhesion G protein-coupled receptor E1; *Tnfa*, tumor necrosis factor- $\alpha$ ; *Mcp1*, monocyte chemoattractant protein-1; *Spp1*, osteopontin; *Timp1*, tissue inhibitor of metalloproteinase 1; *Tgfb1*, transforming growth factor beta 1; *Cxcl9*, C-X-C motif chemokine ligand 9; *IHH*, Indian hedgehog; *HES1*, hes family bHLH transcription factor 1; *NOTCH1*, notch receptor 1; *EPHB2*, Eph receptor B2.

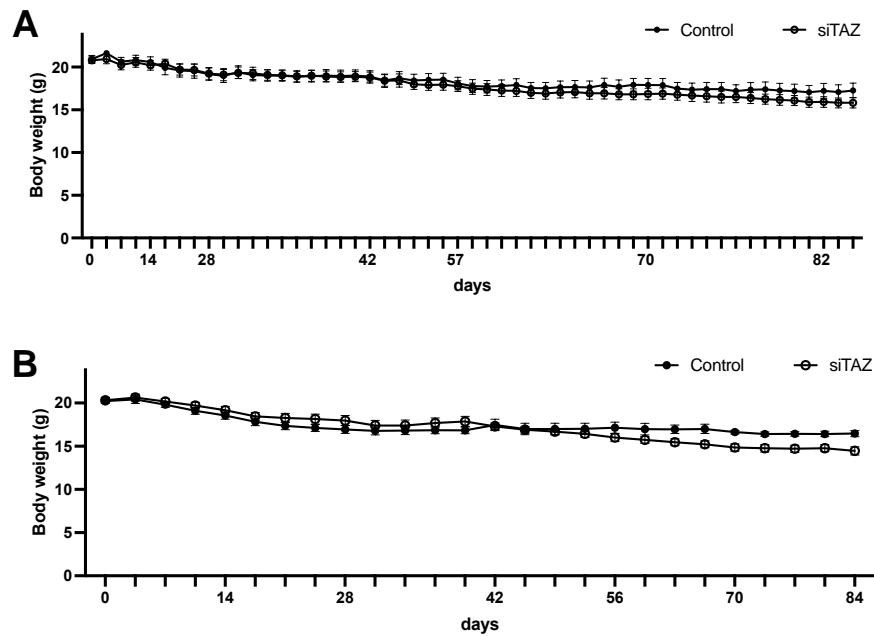

**Fig. S1. Body weight.** (A) Body weight of the mice from Figure 1 as a function of weeks on the HF-CDA diet. (B) Body weight of the mice from Figure 2 as a function of weeks on the HF-CDA diet.
